# Supplementary material
Source: publisher figshare collection journal article supplement (https://frontiersin.figshare.com/ndownloader/files/22906700)

Supplementary: Differential scanning calorimetry results of the PCL/TPS samples.

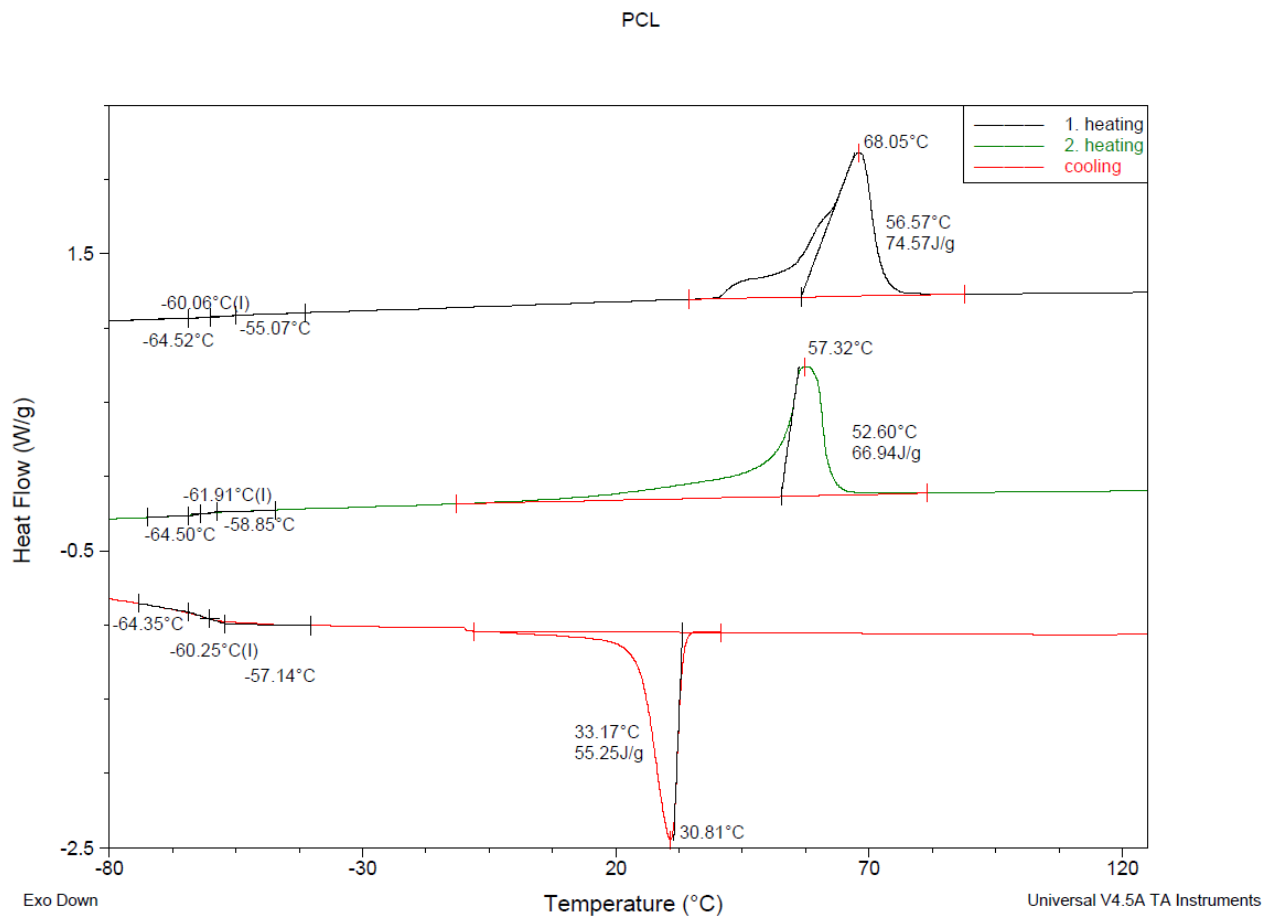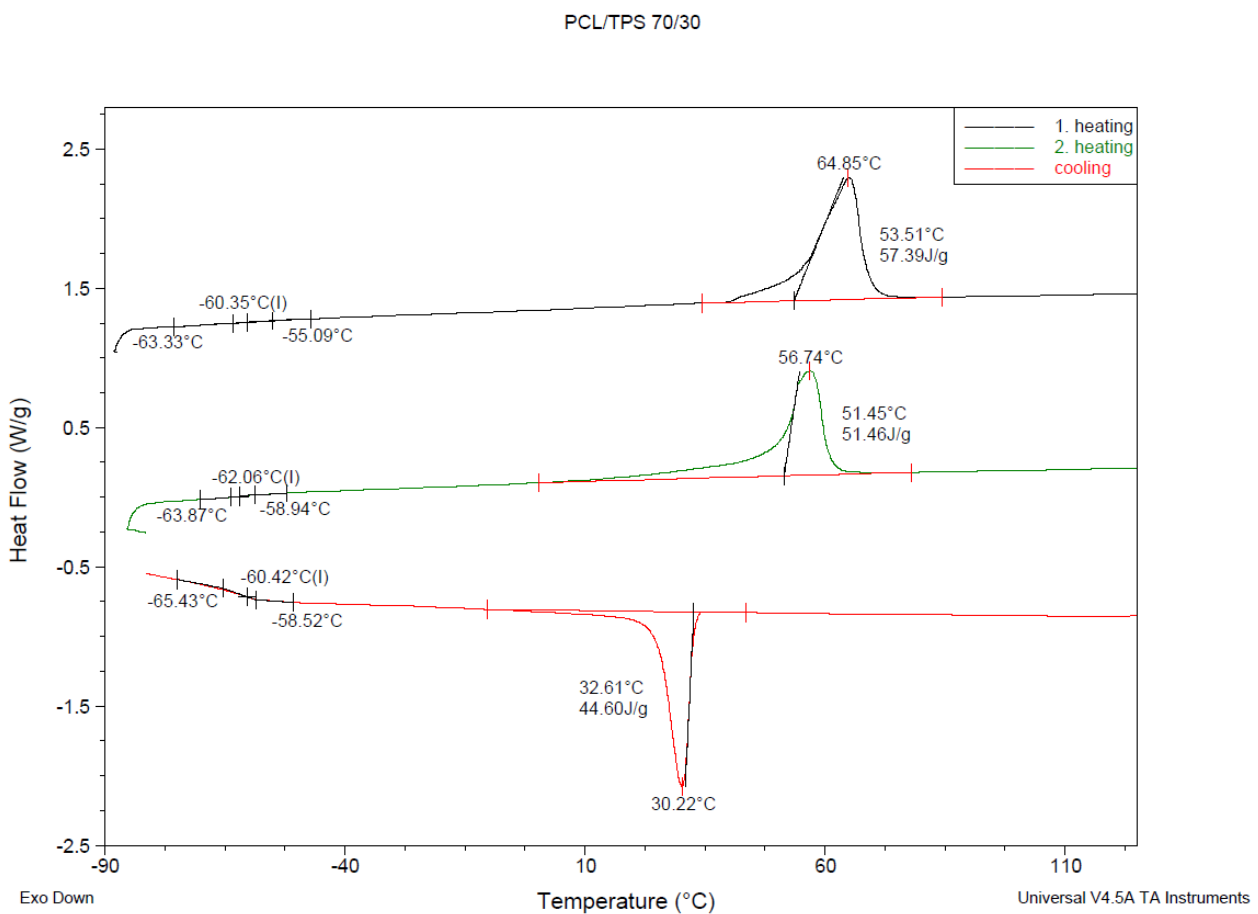

# PCL/TPS 50/50

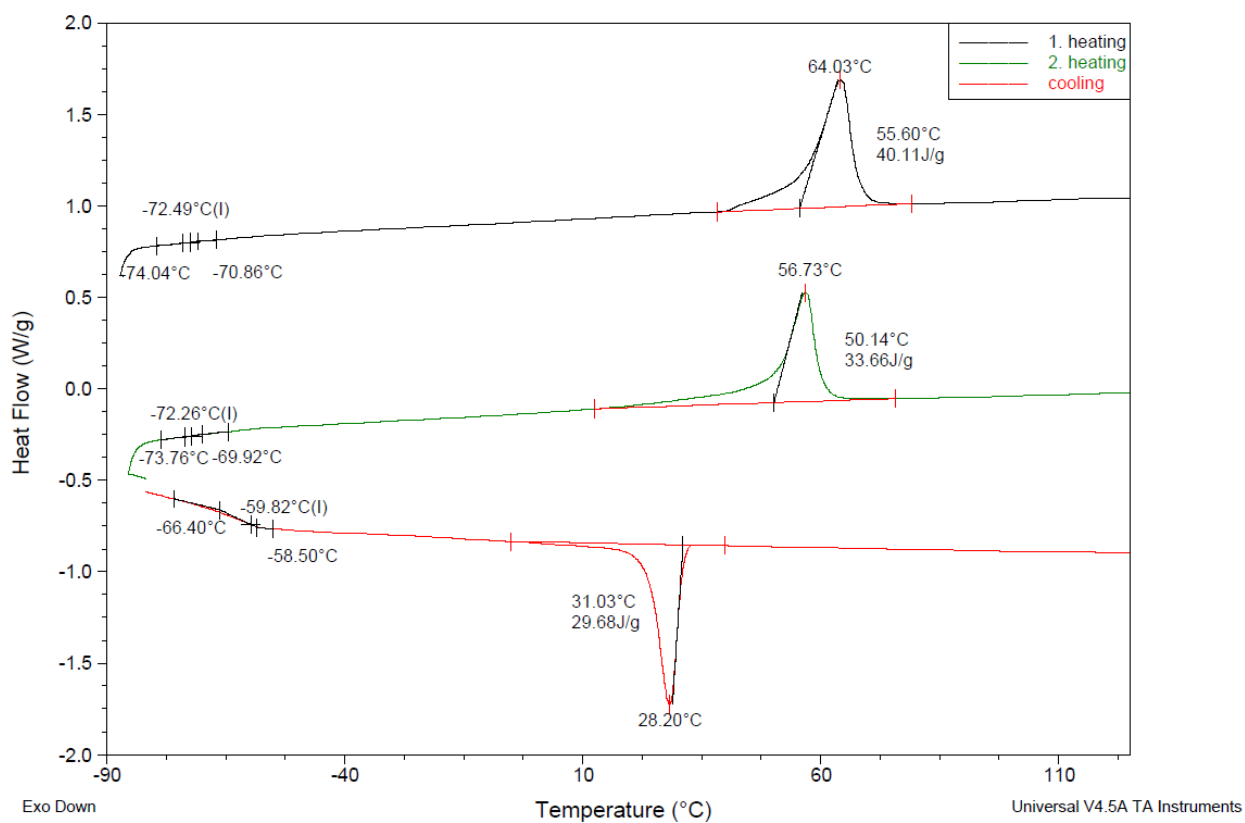

# PCL/TPS 30/70

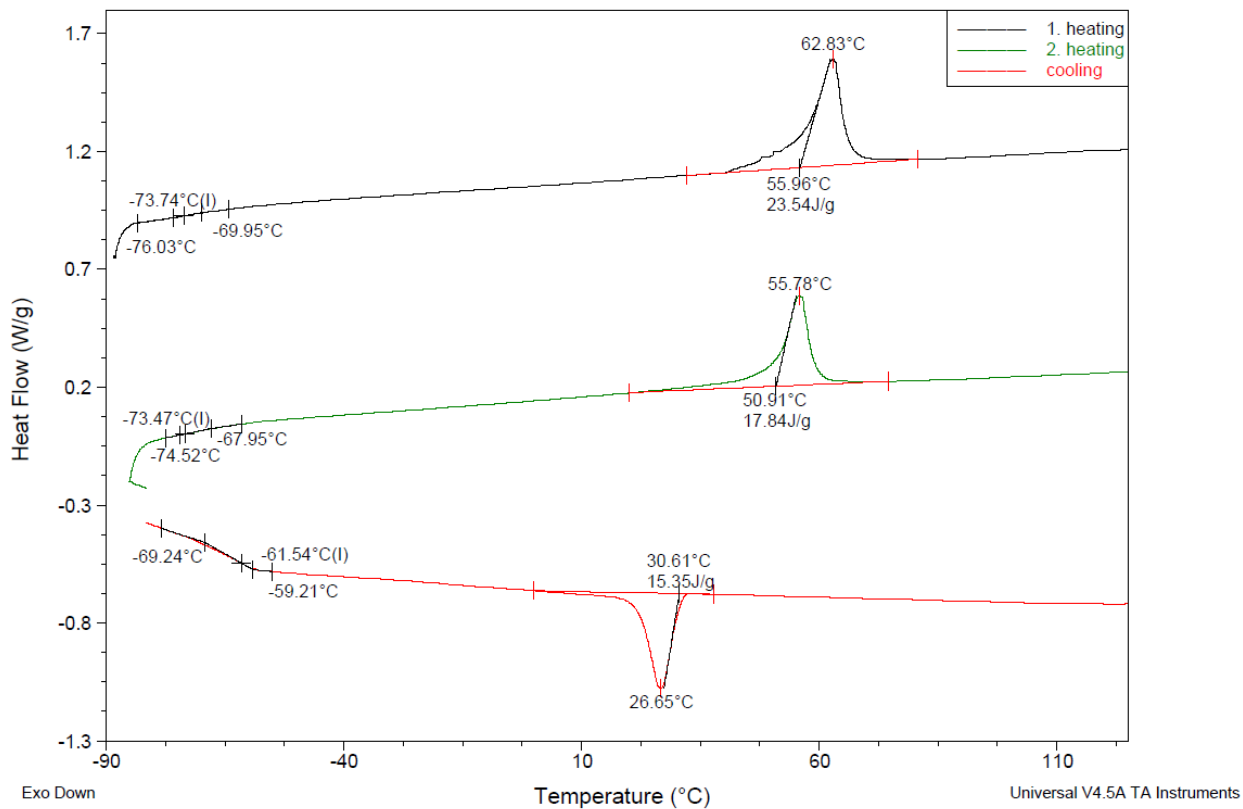

Supplement: Supplementary file 1 [file 22906700]
